# Supplementary material
Source: publisher site journal article supplement (https://static.cambridge.org/content/id/urn:cambridge.org:id:article:S0317167120001468/resource/name/S0317167120001468supp001.docx)
Supplement: Supplementary file 1 [file S0317167120001468supp001.docx]

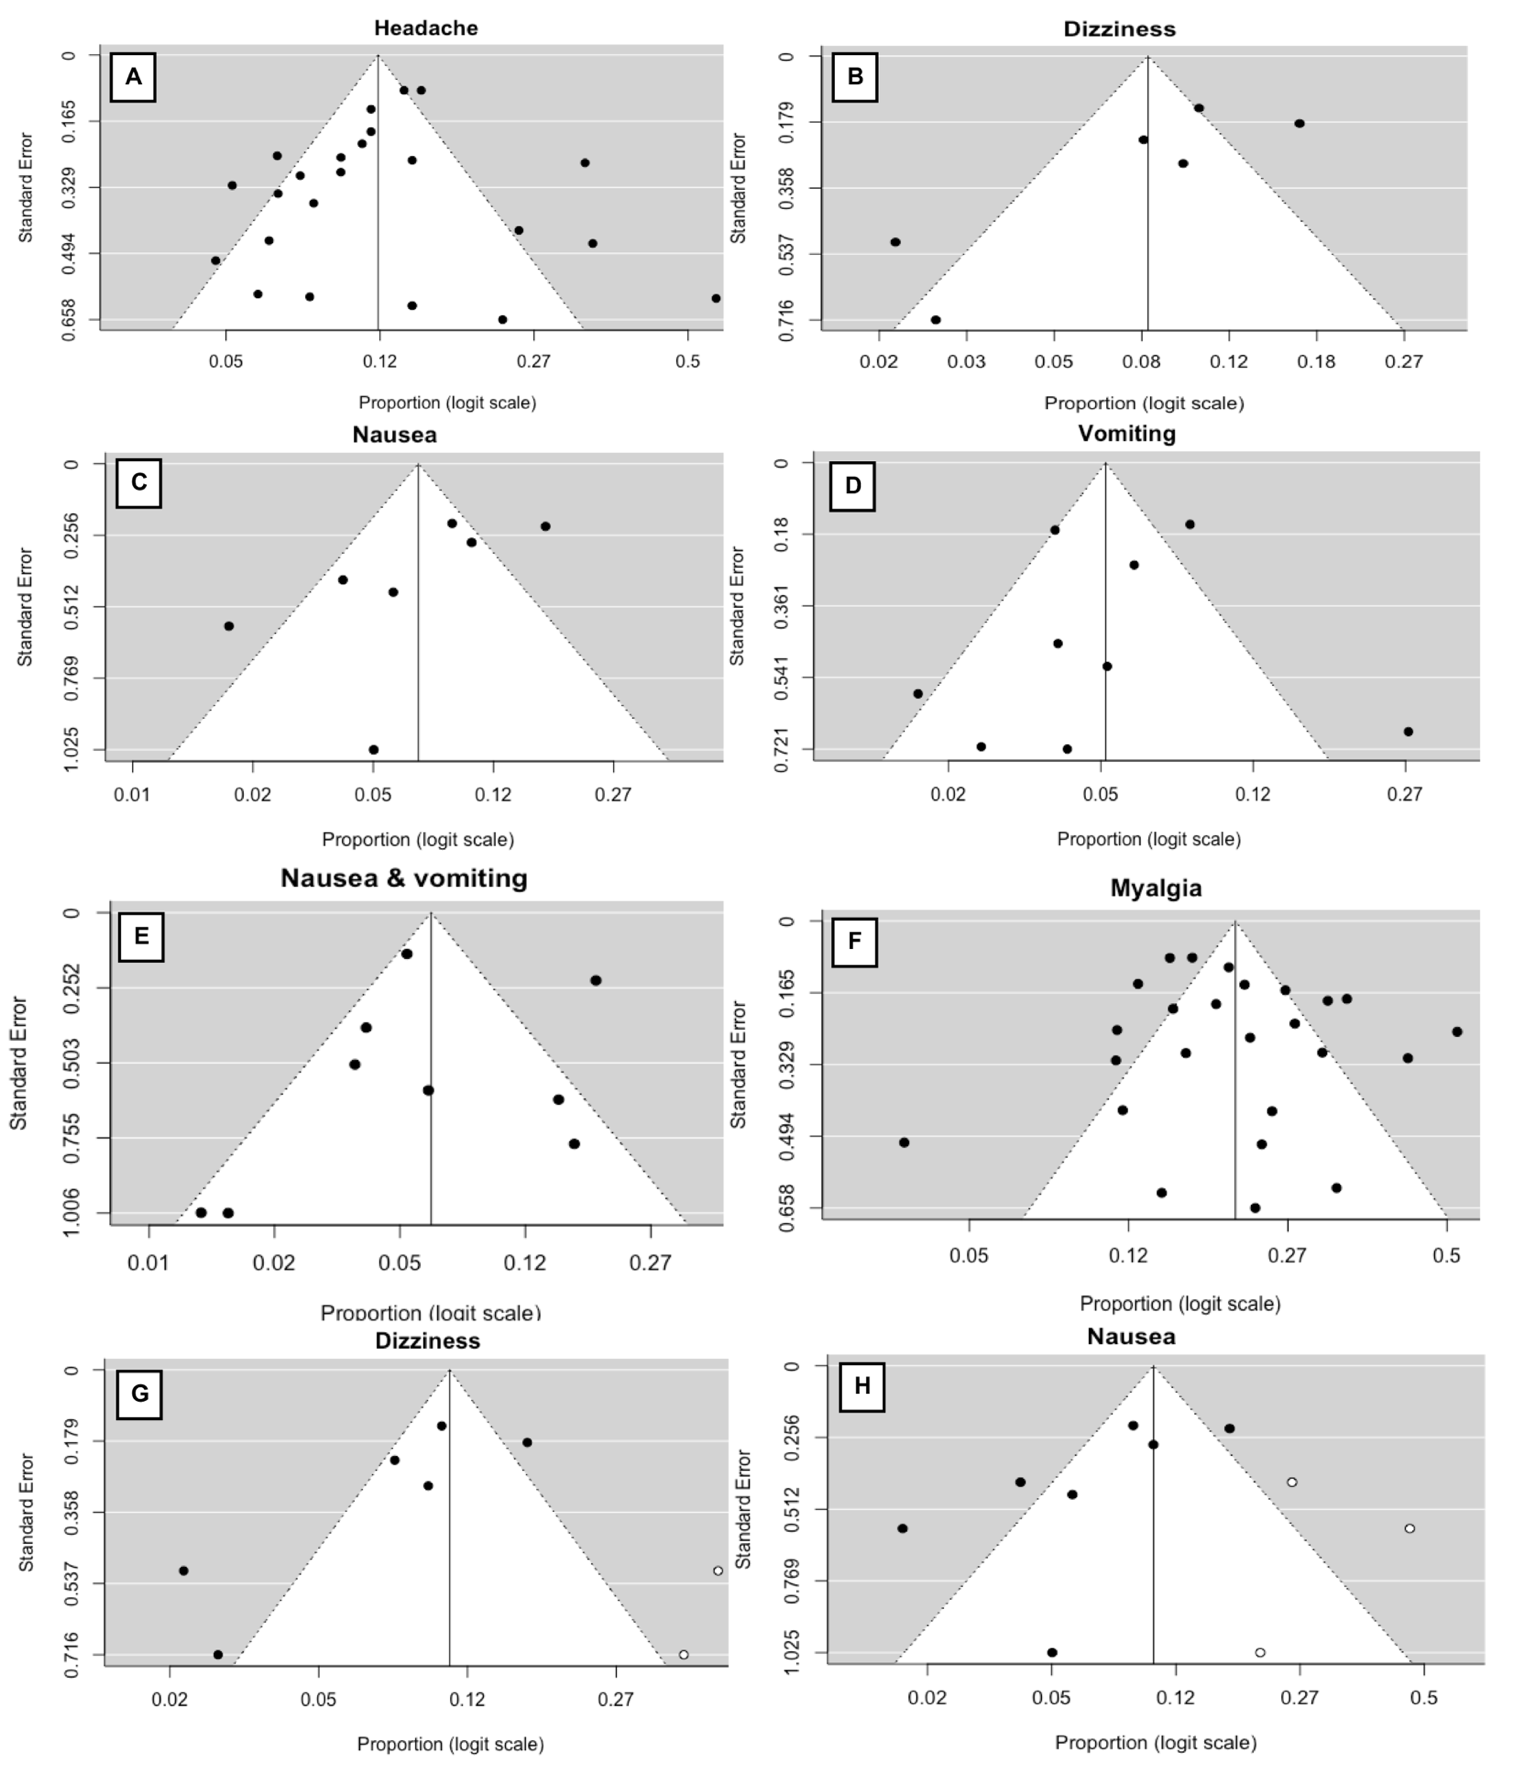


**Supplementary Material 1.** Pertinent funnel and trim-and-fill plots of studies reporting

neurological symptoms associated with COVID-19 infection.
